# Supplementary material
Source: PubMed Central journal article supplement (PMC3813834)
Supplement: 0b9b8e72de58c676535e30e904a043c2_genetics.113.156703-4.pdf [file 0b9b8e72de58c676535e30e904a043c2_genetics.113.156703-4.pdf]

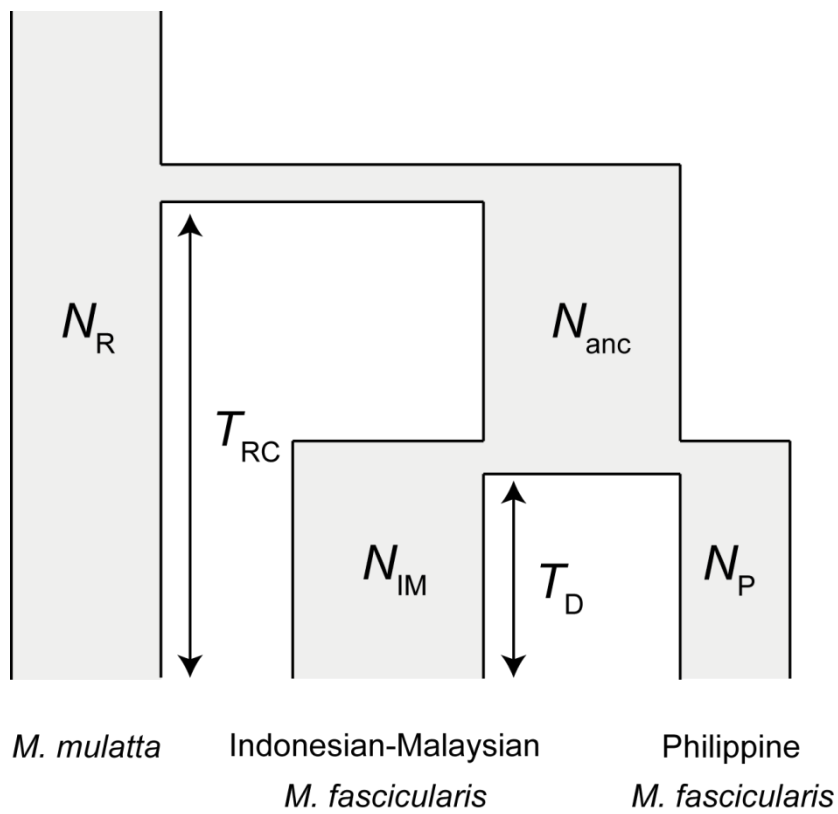

**Figure S2** A demographic model of macaques. Two species have split at time  $T_{RC}$  and the two local populations of *M. fascicularis* have split at time  $T_D$ .
