# Supplementary material
Source: PubMed Central journal article supplement (PMC3813834)
Supplement: 7d2a97af0d912ceecae8b934525e6a49_genetics.113.156703-5.pdf [file 7d2a97af0d912ceecae8b934525e6a49_genetics.113.156703-5.pdf]

(a)

|                  |      | SFS <sub>IM</sub> |     |     |      |       |
|------------------|------|-------------------|-----|-----|------|-------|
| 2D-SFS           |      | 0                 | 0-4 | 4-8 | 8-12 | 12-30 |
| SFS <sub>p</sub> | 0    | 0                 | 159 | 19  | 7    | 5     |
|                  | 0-3  | 17                | 12  | 1   | 1    | 3     |
|                  | 3-6  | 8                 | 9   | 5   | 1    | 1     |
|                  | 6-9  | 5                 | 2   | 7   | 1    | 2     |
|                  | 9-18 | 4                 | 5   | 5   | 9    | 38    |

|                  |      | HFS <sub>IM</sub> |     |     |      |       |
|------------------|------|-------------------|-----|-----|------|-------|
| 2D-HFS           |      | 0                 | 0-4 | 4-8 | 8-12 | 12-30 |
| HFS <sub>p</sub> | 0    | 0                 | 196 | 11  | 5    | 0     |
|                  | 0-3  | 41                | 16  | 6   | 2    | 0     |
|                  | 3-6  | 11                | 9   | 2   | 1    | 3     |
|                  | 6-9  | 1                 | 8   | 2   | 3    | 2     |
|                  | 9-18 | 1                 | 1   | 2   | 2    | 3     |

(b)

|                  |  | 0-4 | 4-8 | 8-12 | 12-16 | 16-30 |
|------------------|--|-----|-----|------|-------|-------|
| SFS <sub>M</sub> |  | 185 | 37  | 19   | 10    | 43    |
| SFS <sub>p</sub> |  | 34  | 24  | 17   | 28    | 37    |
| SFS <sub>R</sub> |  | 102 | 19  | 9    | 10    | 29    |

|                  |  | 6-10 | 0 | 0-4 | 4-8 | 8-12 | 12-30 |
|------------------|--|------|---|-----|-----|------|-------|
| HFS <sub>R</sub> |  | 0    | 1 | 2   | 0   | 2    | 0     |
| HFS <sub>p</sub> |  | 0-3  | 1 | 0   | 0   | 0    | 0     |
| HFS <sub>M</sub> |  | 3-6  | 0 | 0   | 0   | 0    | 0     |
| HFS <sub>p</sub> |  | 6-9  | 0 | 0   | 0   | 0    | 0     |
| HFS <sub>M</sub> |  | 9-18 | 0 | 0   | 0   | 0    | 0     |

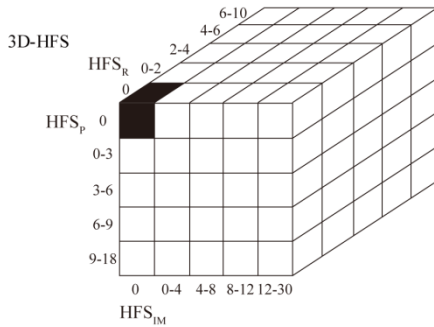

|                  |  | 4-6  | 0 | 0-4 | 4-8 | 8-12 | 12-30 |
|------------------|--|------|---|-----|-----|------|-------|
| HFS <sub>R</sub> |  | 0    | 1 | 2   | 0   | 0    | 0     |
| HFS <sub>p</sub> |  | 0-3  | 0 | 0   | 1   | 1    | 0     |
| HFS <sub>M</sub> |  | 3-6  | 0 | 1   | 0   | 0    | 1     |
| HFS <sub>p</sub> |  | 6-9  | 0 | 0   | 0   | 0    | 0     |
| HFS <sub>M</sub> |  | 9-18 | 0 | 0   | 0   | 0    | 0     |

|                  |  | 2-4  | 0 | 0-4 | 4-8 | 8-12 | 12-30 |
|------------------|--|------|---|-----|-----|------|-------|
| HFS <sub>R</sub> |  | 0    | 9 | 1   | 1   | 0    | 0     |
| HFS <sub>p</sub> |  | 0-3  | 1 | 1   | 0   | 2    | 0     |
| HFS <sub>M</sub> |  | 3-6  | 0 | 1   | 0   | 0    | 0     |
| HFS <sub>p</sub> |  | 6-9  | 0 | 0   | 0   | 0    | 0     |
| HFS <sub>M</sub> |  | 9-18 | 0 | 0   | 0   | 0    | 0     |

|                  |  | 0-2  | 0  | 0-4 | 4-8 | 8-12 | 12-30 |
|------------------|--|------|----|-----|-----|------|-------|
| HFS <sub>R</sub> |  | 0    | 69 | 7   | 2   | 0    | 0     |
| HFS <sub>p</sub> |  | 0-3  | 1  | 0   | 2   | 0    | 0     |
| HFS <sub>M</sub> |  | 3-6  | 1  | 0   | 0   | 1    | 0     |
| HFS <sub>p</sub> |  | 6-9  | 0  | 1   | 0   | 0    | 2     |
| HFS <sub>M</sub> |  | 9-18 | 0  | 0   | 1   | 0    | 0     |

|                  |  | 0    | 0  | 0-4 | 4-8 | 8-12 | 12-30 |
|------------------|--|------|----|-----|-----|------|-------|
| HFS <sub>R</sub> |  | 0    | 0  | 182 | 9   | 3    | 0     |
| HFS <sub>p</sub> |  | 0-3  | 37 | 16  | 2   | 0    | 1     |
| HFS <sub>M</sub> |  | 3-6  | 9  | 7   | 2   | 0    | 1     |
| HFS <sub>p</sub> |  | 6-9  | 2  | 7   | 2   | 3    | 0     |
| HFS <sub>M</sub> |  | 9-18 | 1  | 1   | 2   | 1    | 3     |

**Figure S1** Observed summary statistics for sequence data from (a) two populations (*M. fascicularis*) and (b) three populations (*M. mulatta* and *M. fascicularis*). (a) The data are summarized into 2D-SFS ( $5 \times 5$  bins excluding one bin with the frequency “0”) and 2D-HFS ( $5 \times 5$  bins excluding one bin with the frequency “0”). The frequencies of alleles or haplotypes are binned with “4” in the Indonesian-Malaysian population and “3” in the Philippine population. The 5th bins in SFS<sub>IM</sub> and HFS<sub>IM</sub>, or SFS<sub>p</sub> and HFS<sub>p</sub> are “12–30,” or “9–18,” respectively (b) The data from Burmese *M. mulatta* are added into those from the two populations. SFS<sub>R</sub> and HFS<sub>R</sub> are binned with “2,” and the 5th bins are “8–10” and “6–10.” 3D-HFS is represented as each section separated by the bin of HFS<sub>R</sub>.
