# Supplementary material
Source: PubMed Central journal article supplement (PMC3813834)
Supplement: 70e19ee573ee2cdcd4d55530e9464409_genetics.113.156703-3.pdf [file 70e19ee573ee2cdcd4d55530e9464409_genetics.113.156703-3.pdf]

**Table S2 Accuracy of kernel ABC under population divergence models with constant size and expansion and bottleneck**

|                     |      | $N_{anc}$                               | $N_{IM}$                                | $N_P$                                   | $T_D^*$                               | $T_C^*$                               |
|---------------------|------|-----------------------------------------|-----------------------------------------|-----------------------------------------|---------------------------------------|---------------------------------------|
| Constant size model |      |                                         |                                         |                                         |                                       |                                       |
| True values         |      | 100,000                                 | 100,000                                 | 100,000                                 | 25,000                                | –                                     |
| Priors              |      | LN(E=200000,<br>V=200000 <sup>2</sup> ) | LN(E=200000,<br>V=200000 <sup>2</sup> ) | LN(E=200000,<br>V=200000 <sup>2</sup> ) | LN(E=50000,<br>V=50000 <sup>2</sup> ) | –                                     |
| Posterior estimates | Mean | 102,064                                 | 104,553                                 | 98,028                                  | 25,602                                | –                                     |
|                     | S.D. | 627                                     | 4,684                                   | 5,059                                   | 315                                   | –                                     |
| Model 1             |      |                                         |                                         |                                         |                                       |                                       |
| True values         |      | 100,000                                 | 1,000,000                               | 50,000                                  | 25,000                                | –                                     |
| Priors              |      | LN(E=200000,<br>V=200000 <sup>2</sup> ) | LN(E=500000,<br>V=500000 <sup>2</sup> ) | LN(E=100000,<br>V=100000 <sup>2</sup> ) | LN(E=50000,<br>V=50000 <sup>2</sup> ) | –                                     |
| Posterior estimates | Mean | 109,705                                 | 970,719                                 | 52,136                                  | 25,524                                | –                                     |
|                     | S.D. | 759                                     | 31,078                                  | 787                                     | 275                                   | –                                     |
| Model 2 (25%)       |      |                                         |                                         |                                         |                                       |                                       |
| True values         |      | 100,000                                 | 1,000,000                               | 50,000                                  | 25,000                                | 5,000                                 |
| Priors              |      | LN(E=200000,<br>V=200000 <sup>2</sup> ) | LN(E=500000,<br>V=500000 <sup>2</sup> ) | LN(E=100000,<br>V=100000 <sup>2</sup> ) | LN(E=50000,<br>V=50000 <sup>2</sup> ) | LN(E=10000,<br>V=10000 <sup>2</sup> ) |
| Posterior estimates | Mean | 94,931                                  | 817,480                                 | 60,852                                  | 29,840                                | 6,972                                 |
|                     | S.D. | 486                                     | 16,354                                  | 717                                     | 293                                   | 176                                   |

\* Unit is a generation
