# Supplementary material
Source: PubMed Central journal article supplement (PMC3813834)
Supplement: b083006e23b1fdacedb8458ca986279b_genetics.113.156703-7.pdf [file b083006e23b1fdacedb8458ca986279b_genetics.113.156703-7.pdf]

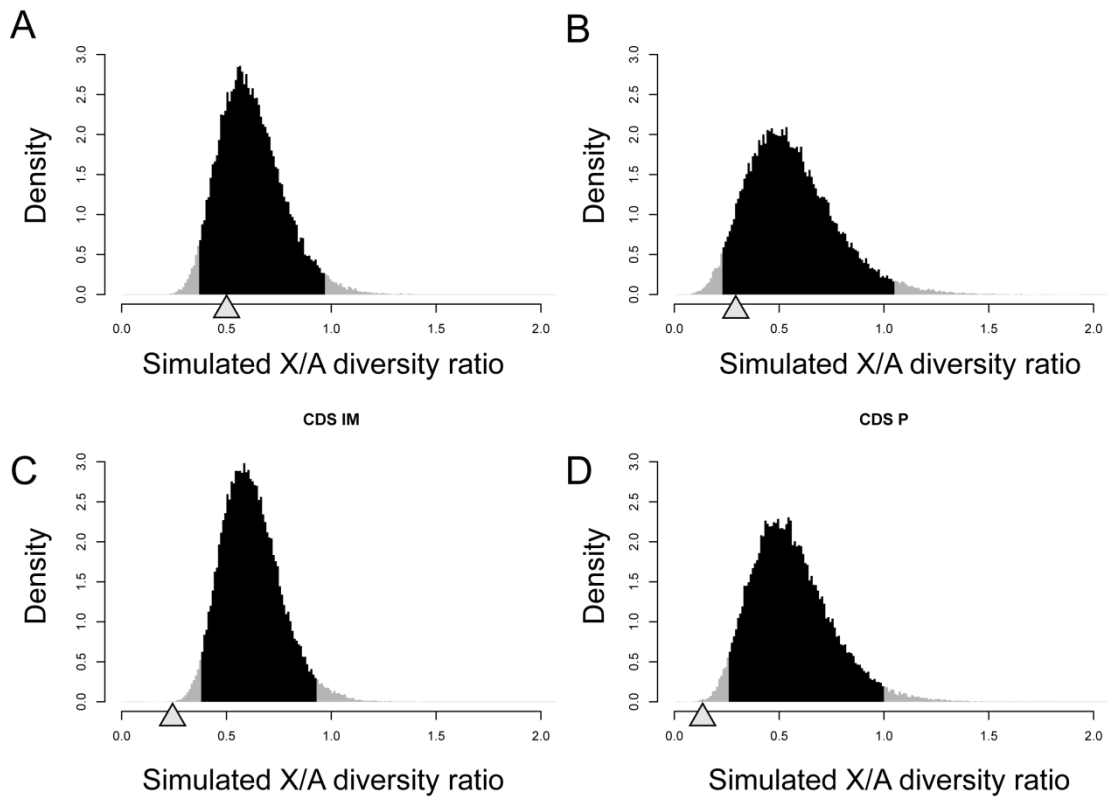

**Figure S4** Distribution of X/A diversity ratio in the simulated datasets. *Papio anubis* instead of humans was used for ancestral state inference. The average recombination rate on the X chromosome was assumed to be the same as that on autosomes. The solid bars represent the density of X/A diversity ratio in the simulated datasets. The black bars indicate 95% confidence intervals. The grey triangles point out the observed values. Mean recombination rate on the X chromosome was a half of that on autosomes. Each panel represents A) IGS in the Indonesian-Malaysian population, B) IGS in the Philippine population, C) CDS in the Indonesian-Malaysian population, and D) CDS in the Philippine population.
