# Supplementary material
Source: PubMed Central journal article supplement (PMC3813834)
Supplement: e9b929542b687807e80ed837ff2a073b_genetics.113.156703-1.pdf [file e9b929542b687807e80ed837ff2a073b_genetics.113.156703-1.pdf]

**File S1**  
**Supplementary Document**

**Application of kernel-ABC for three populations**

We applied the kernel-ABC method to infer the demography of macaques using the IGS data of Indonesian-Malaysian *M. fascicularis* ( $2N = 30$ ), Philippine *M. fascicularis* ( $2N = 18$ ), and Burmese *M. mulatta* ( $2N = 10$ ), which was previously analyzed using a different method (NAKAGOME *et al.* 2012; OSADA *et al.* 2010). The sequence data were summarized into SFS in each population ( $SFS_{IM}$ ,  $SFS_P$ , and  $SFS_R$ ) and three dimensional tensors of HFS (3D-HFS) (Figure S1). The demographic model is shown in Figure S2. In order to investigate the trend of population size change in two *M. fascicularis* populations, we set no assumption for the population size changes and used the same prior density of  $LN(100000, 100000^2)$  for  $N_R$ ,  $N_{C-anc}$ ,  $N_{IM}$ , and  $N_P$ , respectively. The conditions of kernel-ABC and coalescent simulations were the same as those described in Materials and Methods. The estimated parameters are shown in Table S1, supporting the population expansion in the Indonesian-Malaysian *M. fascicularis* and population contraction in the Philippine *M. fascicularis*.

**Validation of kernel-ABC in two population models**

We generated samples that have the same number of loci (26 loci) and similar parameter values to our estimated parameter values in a constant population size model, Model 1, and Model 2 with 25% size. For each model, we generated 10,000 simulated datasets using the parameter values shown in Table S2, and calculated the average of summary statistics (2D-SFS and 2D-HFS) across all datasets. Next, we chose a typical dataset as an observation, which has the smallest sum of squared deviations from the average. Posterior means of demographic parameters were estimated using the kernel-ABC method with 20,000 samples, and the process was repeated for 100 times.

**References**

- Nakagome, S., K. Fukumizu and S. Mano, 2012 Kernel approximate bayesian computation for population genetic inferences. ArXiv e-prints: arXiv:1205.3246.
- Oada, N., Y. Uno, K. Mineta, Y. Kameoka, I. Takahashi *et al.*, 2010 Ancient genome-wide admixture extends beyond the current hybrid zone between *Macaca fascicularis* and *M. mulatta*. *Mol. Ecol.* **19**: 2884-2895.

(a)

|                  |      | SFS <sub>IM</sub> |     |     |      |       |
|------------------|------|-------------------|-----|-----|------|-------|
| 2D-SFS           |      | 0                 | 0-4 | 4-8 | 8-12 | 12-30 |
| SFS <sub>p</sub> | 0    | 0                 | 159 | 19  | 7    | 5     |
|                  | 0-3  | 17                | 12  | 1   | 1    | 3     |
|                  | 3-6  | 8                 | 9   | 5   | 1    | 1     |
|                  | 6-9  | 5                 | 2   | 7   | 1    | 2     |
|                  | 9-18 | 4                 | 5   | 5   | 9    | 38    |

|                  |      | HFS <sub>IM</sub> |     |     |      |       |
|------------------|------|-------------------|-----|-----|------|-------|
| 2D-HFS           |      | 0                 | 0-4 | 4-8 | 8-12 | 12-30 |
| HFS <sub>p</sub> | 0    | 0                 | 196 | 11  | 5    | 0     |
|                  | 0-3  | 41                | 16  | 6   | 2    | 0     |
|                  | 3-6  | 11                | 9   | 2   | 1    | 3     |
|                  | 6-9  | 1                 | 8   | 2   | 3    | 2     |
|                  | 9-18 | 1                 | 1   | 2   | 2    | 3     |

(b)

|                  |  | 0-4 | 4-8 | 8-12 | 12-16 | 16-30 |
|------------------|--|-----|-----|------|-------|-------|
| SFS <sub>M</sub> |  | 185 | 37  | 19   | 10    | 43    |
|                  |  | 0-3 | 3-6 | 6-9  | 9-12  | 12-18 |
| SFS <sub>p</sub> |  | 34  | 24  | 17   | 28    | 37    |
|                  |  | 0-2 | 2-4 | 4-6  | 6-8   | 8-10  |
| SFS <sub>R</sub> |  | 102 | 19  | 9    | 10    | 29    |

|                  |      | 6-10 | 0 | 0-4 | 4-8 | 8-12 | 12-30 |
|------------------|------|------|---|-----|-----|------|-------|
| HFS <sub>R</sub> | 0    | 0    | 1 | 2   | 0   | 2    | 0     |
|                  | 0-3  | 0    | 1 | 0   | 0   | 0    | 0     |
|                  | 3-6  | 0    | 0 | 0   | 0   | 0    | 0     |
|                  | 6-9  | 0    | 0 | 0   | 0   | 0    | 0     |
|                  | 9-18 | 0    | 0 | 0   | 0   | 0    | 0     |

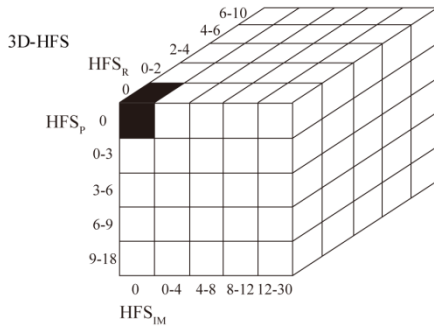

|                  |      | 4-6 | 0 | 0-4 | 4-8 | 8-12 | 12-30 |
|------------------|------|-----|---|-----|-----|------|-------|
| HFS <sub>p</sub> | 0    | 0   | 1 | 2   | 0   | 0    | 0     |
|                  | 0-3  | 0   | 0 | 1   | 1   | 0    | 0     |
|                  | 3-6  | 0   | 1 | 0   | 0   | 0    | 1     |
|                  | 6-9  | 0   | 0 | 0   | 0   | 0    | 0     |
|                  | 9-18 | 0   | 0 | 0   | 0   | 0    | 0     |

|                  |      | 2-4 | 0 | 0-4 | 4-8 | 8-12 | 12-30 |
|------------------|------|-----|---|-----|-----|------|-------|
| HFS <sub>p</sub> | 0    | 0   | 9 | 1   | 1   | 0    | 0     |
|                  | 0-3  | 0   | 1 | 1   | 0   | 2    | 0     |
|                  | 3-6  | 0   | 0 | 1   | 0   | 0    | 0     |
|                  | 6-9  | 0   | 0 | 0   | 0   | 0    | 0     |
|                  | 9-18 | 0   | 0 | 0   | 0   | 0    | 0     |

|                  |      | 0-2 | 0  | 0-4 | 4-8 | 8-12 | 12-30 |
|------------------|------|-----|----|-----|-----|------|-------|
| HFS <sub>p</sub> | 0    | 0   | 69 | 7   | 2   | 0    | 0     |
|                  | 0-3  | 0   | 1  | 0   | 2   | 0    | 0     |
|                  | 3-6  | 0   | 1  | 0   | 0   | 1    | 0     |
|                  | 6-9  | 0   | 0  | 1   | 0   | 0    | 2     |
|                  | 9-18 | 0   | 0  | 0   | 1   | 0    | 0     |

|                  |      | 0 | 0 | 0-4 | 4-8 | 8-12 | 12-30 |
|------------------|------|---|---|-----|-----|------|-------|
| HFS <sub>p</sub> | 0    | 0 | 0 | 182 | 9   | 3    | 0     |
|                  | 0-3  | 0 | 0 | 37  | 16  | 2    | 0     |
|                  | 3-6  | 0 | 0 | 9   | 7   | 2    | 0     |
|                  | 6-9  | 0 | 0 | 2   | 7   | 2    | 3     |
|                  | 9-18 | 0 | 0 | 1   | 1   | 2    | 1     |

**Figure S1** Observed summary statistics for sequence data from (a) two populations (*M. fascicularis*) and (b) three populations (*M. mulatta* and *M. fascicularis*). (a) The data are summarized into 2D-SFS ( $5 \times 5$  bins excluding one bin with the frequency "0") and 2D-HFS ( $5 \times 5$  bins excluding one bin with the frequency "0"). The frequencies of alleles or haplotypes are binned with "4" in the Indonesian-Malaysian population and "3" in the Philippine population. The 5th bins in SFS<sub>IM</sub> and HFS<sub>IM</sub>, or SFS<sub>p</sub> and HFS<sub>p</sub> are "12–30," or "9–18," respectively (b) The data from Burmese *M. mulatta* are added into those from the two populations. SFS<sub>R</sub> and HFS<sub>R</sub> are binned with "2," and the 5th bins are "8–10" and "6–10." 3D-HFS is represented as each section separated by the bin of HFS<sub>R</sub>.

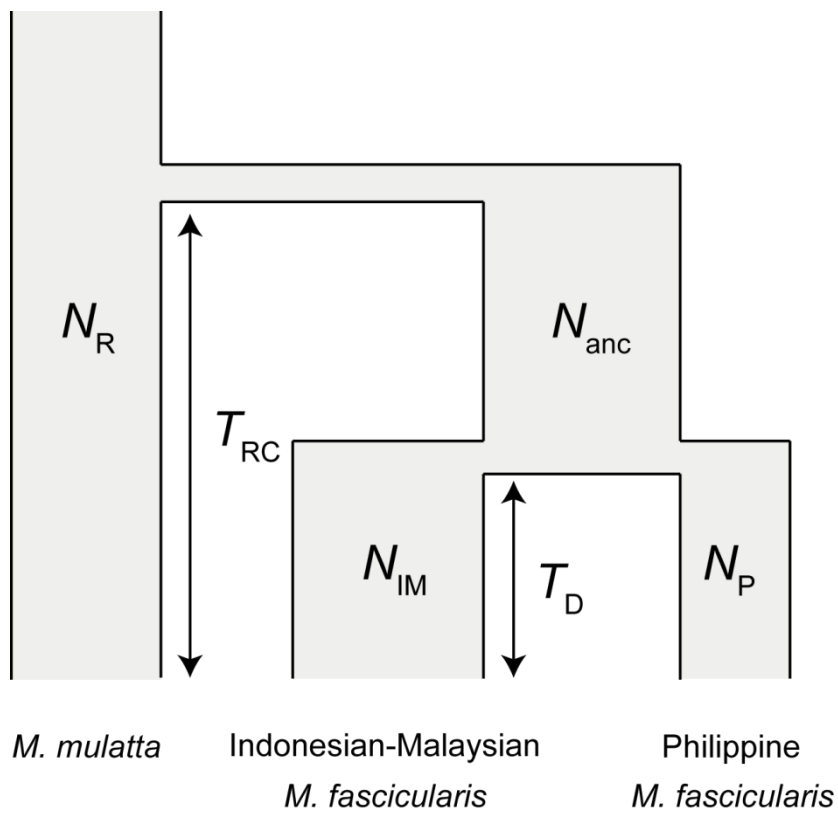

**Figure S2** A demographic model of macaques. Two species have split at time  $T_{RC}$  and the two local populations of *M. fascicularis* have split at time  $T_D$ .

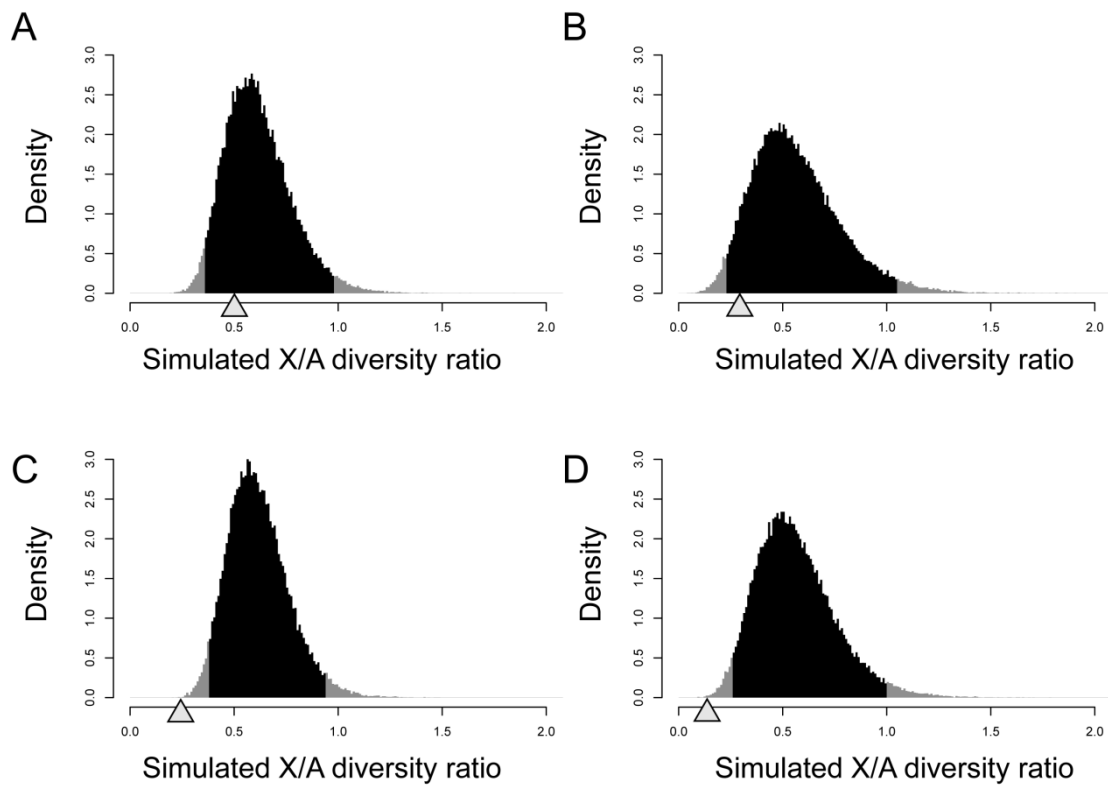

**Figure S3** Distribution of X/A diversity ratio in the simulated datasets. The average recombination rate on the X chromosome was assumed to be a half of that on autosomes. The solid bars represent the density of X/A diversity ratio in the simulated datasets. The black bars indicate 95% confidence intervals. The grey triangles point out the observed values. Mean recombination rate on the X chromosome was a half of that on autosomes. Each panel represents A) IGS in the Indonesian-Malaysian population, B) IGS in the Philippine population, C) CDS in the Indonesian-Malaysian population, and D) CDS in the Philippine population.

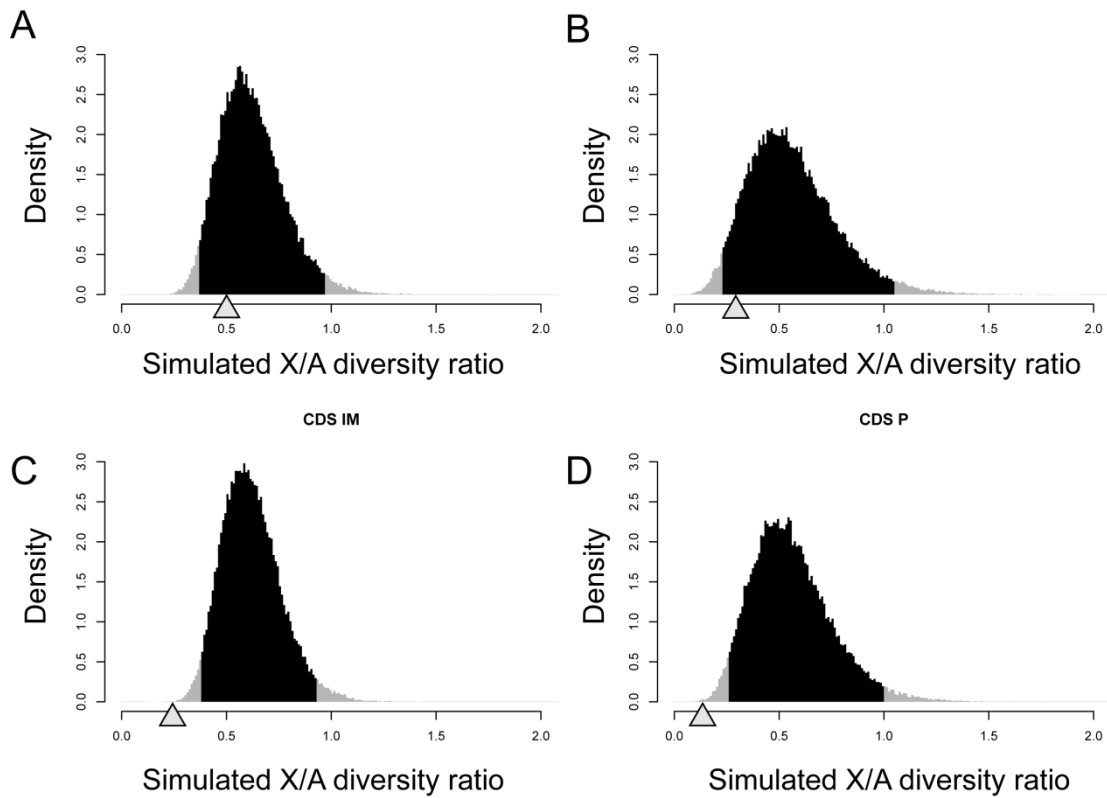

**Figure S4** Distribution of X/A diversity ratio in the simulated datasets. *Papio anubis* instead of humans was used for ancestral state inference. The average recombination rate on the X chromosome was assumed to be the same as that on autosomes. The solid bars represent the density of X/A diversity ratio in the simulated datasets. The black bars indicate 95% confidence intervals. The grey triangles point out the observed values. Mean recombination rate on the X chromosome was a half of that on autosomes. Each panel represents A) IGS in the Indonesian-Malaysian population, B) IGS in the Philippine population, C) CDS in the Indonesian-Malaysian population, and D) CDS in the Philippine population.

**Table S1 Estimated demographic parameters under the three population model**

| parameters  | Priors                               | Posterior estimates |        |
|-------------|--------------------------------------|---------------------|--------|
|             |                                      | Mean                | S.D.   |
| $N_R$       | LN(E=100000, V=100000 <sup>2</sup> ) | 96,958              | 3,734  |
| $N_{C-anc}$ | LN(E=100000, V=100000 <sup>2</sup> ) | 113,605             | 37,636 |
| $N_{IM}$    | LN(E=100000, V=100000 <sup>2</sup> ) | 335,194             | 30,004 |
| $N_P$       | LN(E=100000, V=100000 <sup>2</sup> ) | 50,160              | 15,720 |
| $T_{RC}^*$  | LN(E=100000, V=100000 <sup>2</sup> ) | 82,522              | 6,295  |
| $T_D^*$     | LN(E=100000, V=100000 <sup>2</sup> ) | 31,425              | 3,799  |

\* Unit is a generation

**Table S2 Accuracy of kernel ABC under population divergence models with constant size and expansion and bottleneck**

|                     |      | $N_{anc}$                               | $N_{IM}$                                | $N_P$                                   | $T_D^*$                               | $T_C^*$                               |
|---------------------|------|-----------------------------------------|-----------------------------------------|-----------------------------------------|---------------------------------------|---------------------------------------|
| Constant size model |      |                                         |                                         |                                         |                                       |                                       |
| True values         |      | 100,000                                 | 100,000                                 | 100,000                                 | 25,000                                | –                                     |
| Priors              |      | LN(E=200000,<br>V=200000 <sup>2</sup> ) | LN(E=200000,<br>V=200000 <sup>2</sup> ) | LN(E=200000,<br>V=200000 <sup>2</sup> ) | LN(E=50000,<br>V=50000 <sup>2</sup> ) | –                                     |
| Posterior estimates | Mean | 102,064                                 | 104,553                                 | 98,028                                  | 25,602                                | –                                     |
|                     | S.D. | 627                                     | 4,684                                   | 5,059                                   | 315                                   | –                                     |
| Model 1             |      |                                         |                                         |                                         |                                       |                                       |
| True values         |      | 100,000                                 | 1,000,000                               | 50,000                                  | 25,000                                | –                                     |
| Priors              |      | LN(E=200000,<br>V=200000 <sup>2</sup> ) | LN(E=500000,<br>V=500000 <sup>2</sup> ) | LN(E=100000,<br>V=100000 <sup>2</sup> ) | LN(E=50000,<br>V=50000 <sup>2</sup> ) | –                                     |
| Posterior estimates | Mean | 109,705                                 | 970,719                                 | 52,136                                  | 25,524                                | –                                     |
|                     | S.D. | 759                                     | 31,078                                  | 787                                     | 275                                   | –                                     |
| Model 2 (25%)       |      |                                         |                                         |                                         |                                       |                                       |
| True values         |      | 100,000                                 | 1,000,000                               | 50,000                                  | 25,000                                | 5,000                                 |
| Priors              |      | LN(E=200000,<br>V=200000 <sup>2</sup> ) | LN(E=500000,<br>V=500000 <sup>2</sup> ) | LN(E=100000,<br>V=100000 <sup>2</sup> ) | LN(E=50000,<br>V=50000 <sup>2</sup> ) | LN(E=10000,<br>V=10000 <sup>2</sup> ) |
| Posterior estimates | Mean | 94,931                                  | 817,480                                 | 60,852                                  | 29,840                                | 6,972                                 |
|                     | S.D. | 486                                     | 16,354                                  | 717                                     | 293                                   | 176                                   |

\* Unit is a generation
